# Supplementary material for: Nickel sulfide-incorporated sulfur-doped graphitic carbon nitride nanohybrid interface for non-enzymatic electrochemical sensing of glucose
Source: Royal Society of Chemistry journal article supplement (doi:10.1039/d0na00172d), 2020-01-01
Supplement: d0na00172d1.pdf [file d0na00172d1.pdf]

## Supporting information

### **Nickel Sulfide incorporated sulfur-doped graphitic carbon nitride nanohybrid interface for non-enzymatic electrochemical sensing of glucose**

**S.Vinoth,<sup>a,c</sup> P. Mary Rajitha,<sup>a</sup> A. Venkadesh<sup>b</sup>, K. S. Shalini Devi,<sup>a</sup> S. Radhakrishnan<sup>b</sup> and A. Pandikumar,<sup>a,c\*</sup>**

<sup>a</sup>Materials Electrochemistry Division, CSIR-Central Electrochemical Research Institute, Karaikudi-630 003, Tamil Nadu, India.

<sup>b</sup>Electrodes and Electrocatalysis Division, CSIR-Central Electrochemical Research Institute, Karaikudi-630 003, Tamil Nadu, India.

<sup>c</sup>Academy of Scientific and Innovative Research (AcSIR), Ghaziabad- 201002, India

*\*Corresponding Author E-mail: [pandikumarinbox@gmail.com](mailto:pandikumarinbox@gmail.com)  
[pandikumar@cecri.res.in](mailto:pandikumar@cecri.res.in)*

### 2.3. Characterization techniques

HR-TEM, Tecnai G<sup>2</sup> TF20 higher resolution transmission electron microscopy operating at an accelerating voltage of 200 kV was used to study the structure and size of the sample. BRUKER D8 ADVANCE X-ray Diffractometer with Cu K<sub>α</sub> radiation ( $\alpha=1.5418 \text{ \AA}$ ) used to investigate the crystalline nature of the sample. Surface elemental analysis and oxidation state of the prepared sample was investigated using X-ray photoelectron spectroscopy (XPS) with Mg K<sub>α</sub> (1253.6 eV) as X-ray source (Thermo Scientific, MULTILAB 2000). Fourier transform infrared (FTIR) spectrum was measured using Bruker Optik GmbH, Germany (Model: TENSOR 27). Thermogravimetric analysis (TGA) was studied in TGA/DTA analyzer (SDT Q 600) in nitrogen atmosphere. The electrochemical measurements such as cyclic voltammetry (CV), linear sweep voltammetry (LSV) and chronoamperometry (CA) were demonstrated with a PalmSens electrochemical instrument using a conventional three-electrode system consist of S-gC<sub>3</sub>N<sub>4</sub>-NiS modified glassy carbon electrode (GCE; 3 mm in diameter) as working electrode, a Ag/AgCl (3 M KCl) as the reference electrode and platinum foil as auxiliary electrode. The electrochemical measurements were recorded at room temperature in 0.1 M NaOH solution.

## Figures and Captions

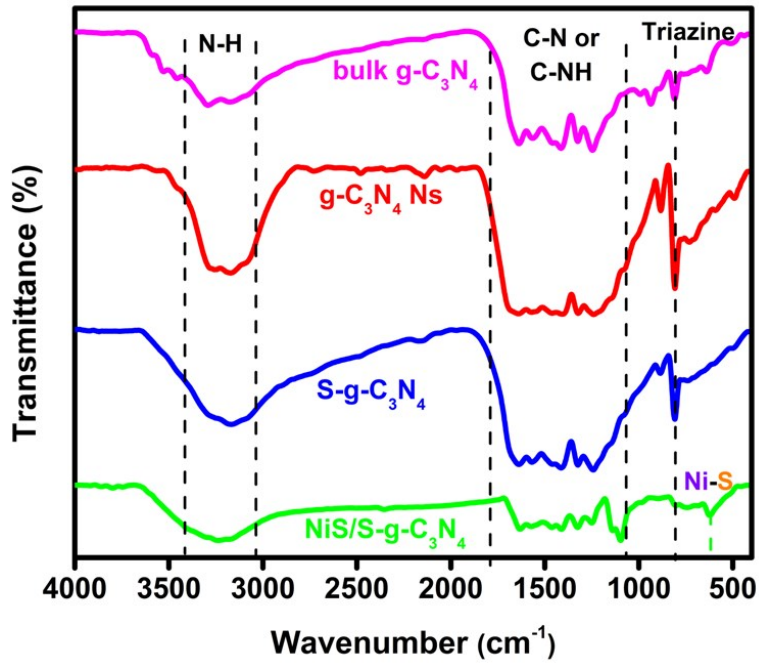

Fig. S1. FT-IR spectra obtained for bulk  $\text{g-C}_3\text{N}_4$ ,  $\text{g-C}_3\text{N}_4$  nanosheet,  $\text{S-g-C}_3\text{N}_4$ , and  $\text{NiS/g-C}_3\text{N}_4$

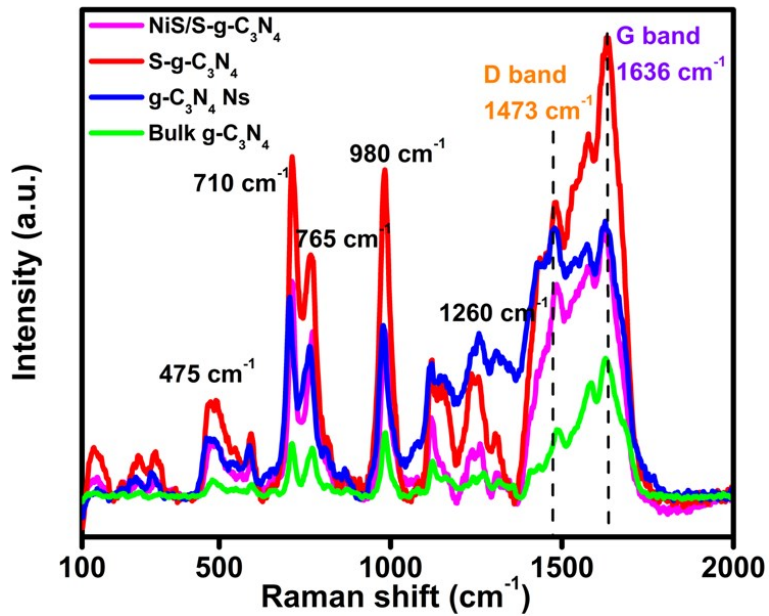

Fig. S2. Raman spectra obtained for bulk  $\text{g-C}_3\text{N}_4$ ,  $\text{g-C}_3\text{N}_4$  nanosheet,  $\text{S-g-C}_3\text{N}_4$ , and  $\text{NiS/g-C}_3\text{N}_4$

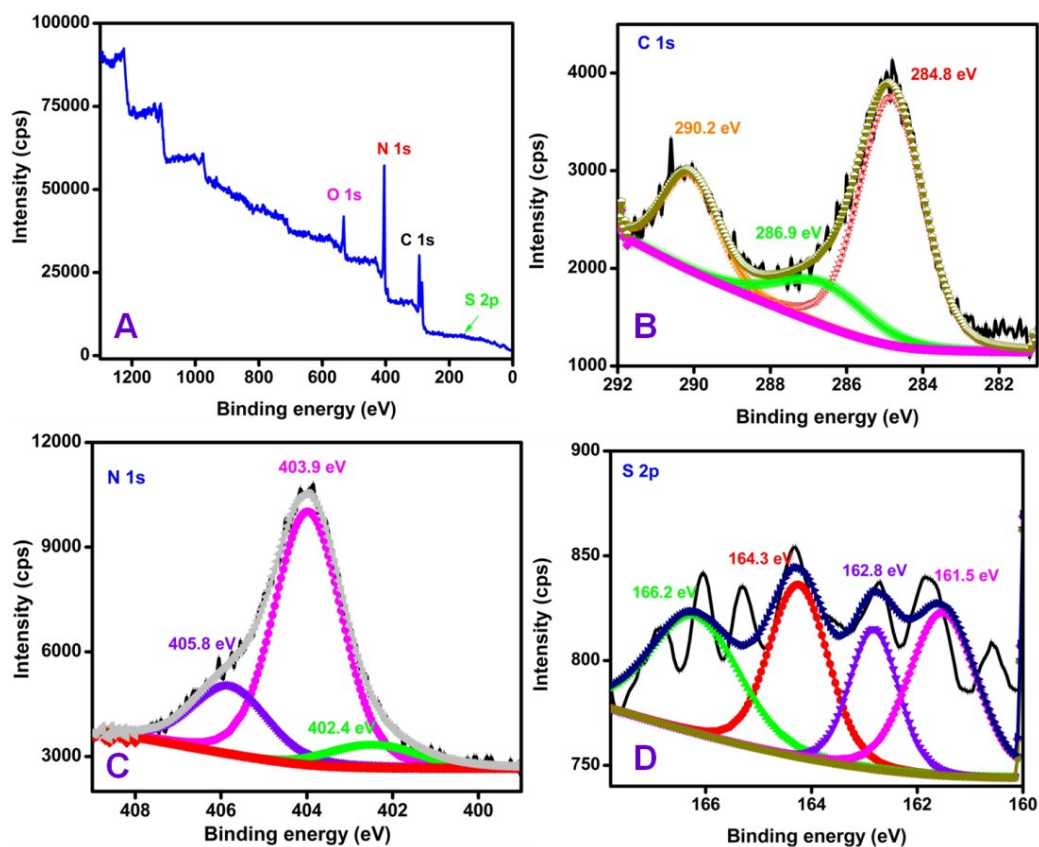

**Fig. S3.** XPS spectra for S-gCN nanosheet (A) survey scan, (B) C 1s, (C) N 1s, and (D) S 2p core-level spectra.

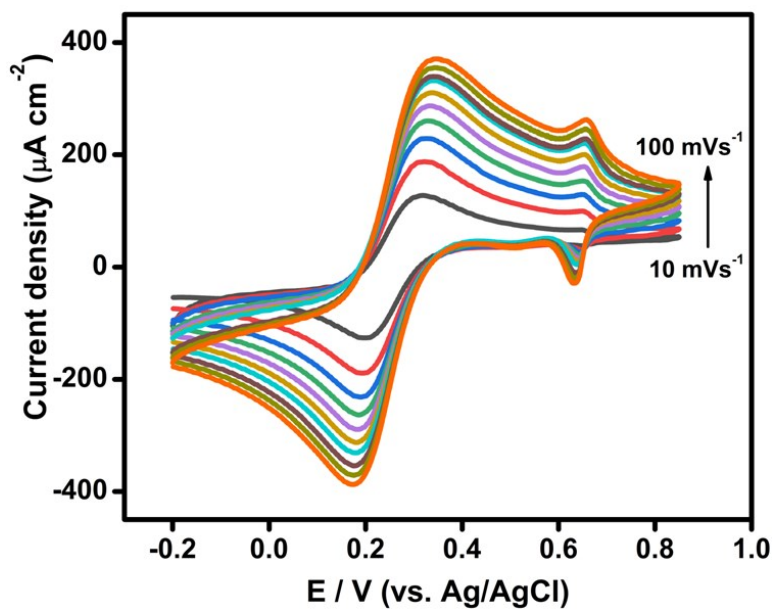

**Fig. S4.** Voltammetric responses of different scan rates (10 to 100 mV s<sup>-1</sup>) in presence of Fe(CN)<sub>6</sub><sup>3-/4-</sup> at NiS/S-g-C<sub>3</sub>N<sub>4</sub>/GCE modified electrode in 0.1 M KCl solution.

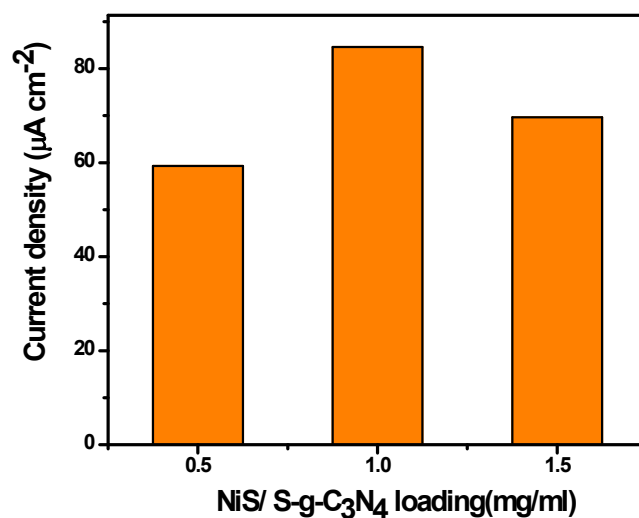

**Fig S5.** Plot of current density vs. various loading of NiS/S-g-C<sub>3</sub>N<sub>4</sub>/GCE with 0.5 mM of glucose

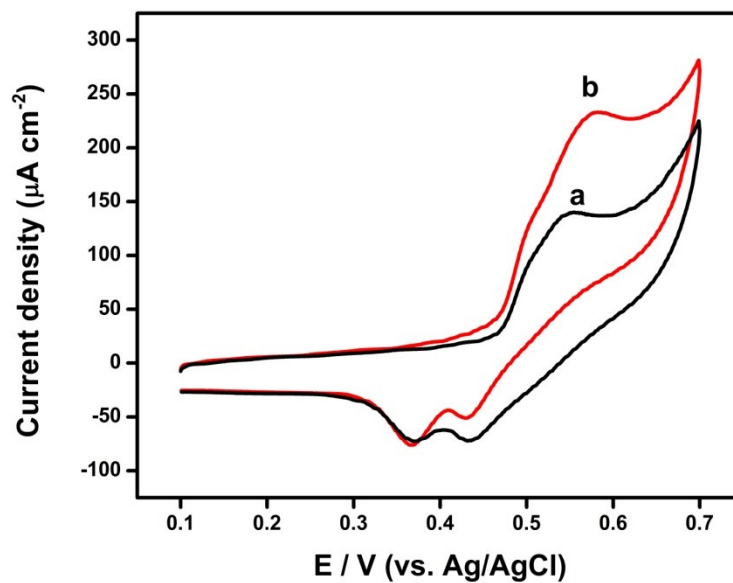

**Fig. S6.** Cyclic voltammograms response of Bare NiS/GC in 0.1M NaOH (a) without glucose (b) with 0.5 mM glucose.

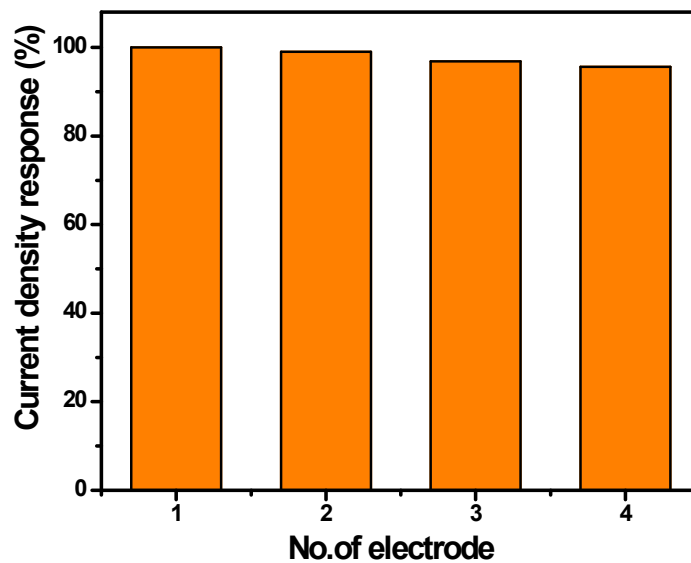

**Fig S7.** Reproducibility of four different NiS/S-g-C<sub>3</sub>N<sub>4</sub> modified GCE with 0.3 mM of glucose

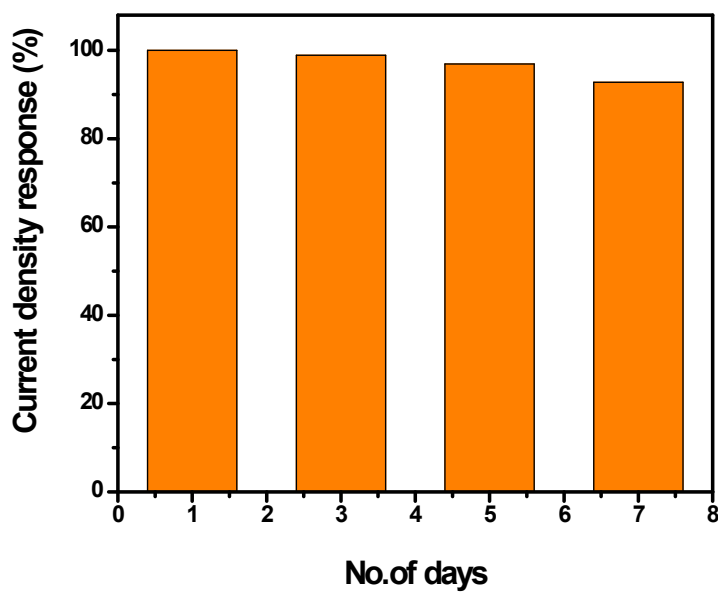

**Fig S8.** Sustainability of NiS/S-g-C<sub>3</sub>N<sub>4</sub> modified nanohybrid with 0.3 mM of glucose for 7 days
